# Supplementary material for: Trends in Alzheimer Disease and Chronic Kidney Disease–Associated Mortality in the United States, 1999–2020: A Multiple-Cause Analysis of CDC WONDER Data
Source: Research Square preprint supplement (doi:10.21203/rs.3.rs-7566108/v1), 2025-09-30
Supplement: Supplementary file 1 [file a90f1c4a795e6523f48ef2a7.docx]

**SUPPLEMENTARY FILE**

| **Variable** | **Deaths** | **Population** | **Overall AAMR per 100,000 deaths(95% CI)** |
| --- | --- | --- | --- |
| Overall | 48,770 | 4,473,854,489 | 1.01 |
|  |  |  |  |
| Sex |  |  |  |
| Male | 19,551 | 2,154,556,911 | 1.13 |
| Female | 29,219 | 2,319,297,578 | 0.94 |
|  |  |  |  |
| Race |  |  |  |
| NH Asian or Pacific Islander | 1,213 | 245,576,124 | 0.78 |
| NH Black or African American | 5,113 | 546,447,527 | 1.36 |
| NH Whites | 42,284 | 3,631,977,407 | 0.99 |
| NH American Indian or Alaska Native | 160 | 49,853,431 | 0.68 |
| Hispanics | 2,748 | 589,350,210 | 0.35 |
|  |  |  |  |
| Urbanization |  |  |  |
| Metropolitan | 38,757 | 3,795,213,822 | 0.98 |
| Non Metropolitan | 10,013 | 678,634,169 | 1.17 |

**Supplementary Table 1: Frequency and age adjusted mortality rates per 100,000 deaths in adults aged 25-85+ in the United States, 1999 to 2020**

| **Year** | **Deaths** | **Population** | **Age Adjusted Rate** | **Age Adjusted Rate Lower 95% Confidence Interval** | **Age Adjusted Rate Upper 95% Confidence Interval** | **Age Adjusted Rate Standard Error** |
| --- | --- | --- | --- | --- | --- | --- |
| 1999 | 621 | 180408769 | 0.3496 | 0.322 | 0.3773 | 0.0141 |
| 2000 | 798 | 181984640 | 0.444 | 0.413 | 0.4749 | 0.0158 |
| 2001 | 956 | 184305128 | 0.5251 | 0.4917 | 0.5585 | 0.017 |
| 2002 | 1064 | 186208028 | 0.5744 | 0.5398 | 0.609 | 0.0177 |
| 2003 | 1181 | 188090429 | 0.6317 | 0.5955 | 0.6679 | 0.0185 |
| 2004 | 1360 | 190205384 | 0.7122 | 0.6743 | 0.7501 | 0.0193 |
| 2005 | 1498 | 192551384 | 0.7789 | 0.7394 | 0.8185 | 0.0202 |
| 2006 | 1459 | 195019359 | 0.7414 | 0.7032 | 0.7795 | 0.0195 |
| 2007 | 1608 | 197403777 | 0.7879 | 0.7493 | 0.8266 | 0.0197 |
| 2008 | 1525 | 199795090 | 0.7392 | 0.7019 | 0.7766 | 0.019 |
| 2009 | 1414 | 202107016 | 0.66 | 0.6254 | 0.6946 | 0.0177 |
| 2010 | 1420 | 203891983 | 0.6552 | 0.6209 | 0.6894 | 0.0175 |
| 2011 | 3605 | 206592936 | 1.6243 | 1.5709 | 1.6777 | 0.0272 |
| 2012 | 4033 | 208826037 | 1.7633 | 1.7084 | 1.8181 | 0.028 |
| 2013 | 2200 | 211085314 | 0.9337 | 0.8943 | 0.973 | 0.0201 |
| 2014 | 2305 | 213809280 | 0.9591 | 0.9195 | 0.9986 | 0.0202 |
| 2015 | 2721 | 216553817 | 1.1072 | 1.0652 | 1.1492 | 0.0214 |
| 2016 | 3201 | 218641417 | 1.2772 | 1.2325 | 1.3218 | 0.0228 |
| 2017 | 3535 | 221447331 | 1.3838 | 1.3378 | 1.4298 | 0.0235 |
| 2018 | 3673 | 223311190 | 1.4212 | 1.375 | 1.4675 | 0.0236 |
| 2019 | 3790 | 224981167 | 1.435 | 1.3891 | 1.481 | 0.0234 |
| 2020 | 4803 | 226635013 | 1.795 | 1.744 | 1.846 | 0.026 |

**Supplementary Table 2: Annual age adjusted mortality rates per 100,000 deaths in adults aged 25-85+ in the United States, 1999 to 2020**

| **Sex** | **Year** | **Deaths** | **Population** | **Age Adjusted Rate** | **Age Adjusted Rate Lower 95% Confidence Interval** | **Age Adjusted Rate Upper 95% Confidence Interval** | **Age Adjusted Rate Standard Error** |
| --- | --- | --- | --- | --- | --- | --- | --- |
| Female | 1999 | 359 | 94123092 | 0.3048 | 0.2731 | 0.3365 | 0.0162 |
| Female | 2000 | 456 | 94864102 | 0.3803 | 0.3451 | 0.4154 | 0.0179 |
| Female | 2001 | 548 | 95984408 | 0.4569 | 0.4182 | 0.4955 | 0.0197 |
| Female | 2002 | 615 | 96927703 | 0.5062 | 0.4659 | 0.5464 | 0.0205 |
| Female | 2003 | 681 | 97893297 | 0.5512 | 0.5095 | 0.5929 | 0.0213 |
| Female | 2004 | 783 | 98921524 | 0.6298 | 0.5856 | 0.6741 | 0.0226 |
| Female | 2005 | 854 | 100097839 | 0.6774 | 0.6316 | 0.7232 | 0.0234 |
| Female | 2006 | 873 | 101328442 | 0.6746 | 0.6295 | 0.7198 | 0.023 |
| Female | 2007 | 933 | 102513830 | 0.7101 | 0.664 | 0.7561 | 0.0235 |
| Female | 2008 | 884 | 103688156 | 0.6533 | 0.6097 | 0.6969 | 0.0223 |
| Female | 2009 | 830 | 104834186 | 0.608 | 0.5661 | 0.6499 | 0.0214 |
| Female | 2010 | 842 | 105717426 | 0.6104 | 0.5686 | 0.6522 | 0.0213 |
| Female | 2011 | 2203 | 107004480 | 1.5404 | 1.4749 | 1.606 | 0.0334 |
| Female | 2012 | 2475 | 108088829 | 1.6902 | 1.6225 | 1.7579 | 0.0346 |
| Female | 2013 | 1291 | 109172782 | 0.8719 | 0.8233 | 0.9204 | 0.0248 |
| Female | 2014 | 1388 | 110581619 | 0.9065 | 0.8579 | 0.955 | 0.0248 |
| Female | 2015 | 1611 | 111947362 | 1.0462 | 0.9942 | 1.0983 | 0.0266 |
| Female | 2016 | 1971 | 112990913 | 1.2618 | 1.205 | 1.3185 | 0.0289 |
| Female | 2017 | 2132 | 114358026 | 1.3345 | 1.2769 | 1.392 | 0.0293 |
| Female | 2018 | 2214 | 115265998 | 1.3831 | 1.3247 | 1.4415 | 0.0298 |
| Female | 2019 | 2316 | 116084432 | 1.4228 | 1.3642 | 1.4813 | 0.0299 |
| Female | 2020 | 2960 | 116909132 | 1.7979 | 1.7326 | 1.8633 | 0.0333 |
| Male | 1999 | 262 | 86285677 | 0.4451 | 0.3899 | 0.5004 | 0.0282 |
| Male | 2000 | 342 | 87120538 | 0.5791 | 0.5167 | 0.6416 | 0.0319 |
| Male | 2001 | 408 | 88320720 | 0.6675 | 0.6019 | 0.7332 | 0.0335 |
| Male | 2002 | 449 | 89280325 | 0.7123 | 0.6454 | 0.7793 | 0.0342 |
| Male | 2003 | 500 | 90197132 | 0.7818 | 0.712 | 0.8515 | 0.0356 |
| Male | 2004 | 577 | 91283860 | 0.8727 | 0.8003 | 0.945 | 0.0369 |
| Male | 2005 | 644 | 92453545 | 0.9618 | 0.8869 | 1.0367 | 0.0382 |
| Male | 2006 | 586 | 93690917 | 0.836 | 0.7676 | 0.9043 | 0.0349 |
| Male | 2007 | 675 | 94889947 | 0.9471 | 0.8753 | 1.019 | 0.0366 |
| Male | 2008 | 641 | 96106934 | 0.8698 | 0.8021 | 0.9375 | 0.0345 |
| Male | 2009 | 584 | 97272830 | 0.7618 | 0.6995 | 0.8241 | 0.0318 |
| Male | 2010 | 578 | 98174557 | 0.7459 | 0.6849 | 0.8069 | 0.0311 |
| Male | 2011 | 1402 | 99588456 | 1.7443 | 1.6528 | 1.8358 | 0.0467 |
| Male | 2012 | 1558 | 100737208 | 1.8807 | 1.7871 | 1.9744 | 0.0478 |
| Male | 2013 | 909 | 101912532 | 1.0526 | 0.9839 | 1.1213 | 0.0351 |
| Male | 2014 | 917 | 103227661 | 1.0206 | 0.9541 | 1.0872 | 0.034 |
| Male | 2015 | 1110 | 104606455 | 1.2239 | 1.1518 | 1.2961 | 0.0368 |
| Male | 2016 | 1230 | 105650504 | 1.3099 | 1.2363 | 1.3836 | 0.0376 |
| Male | 2017 | 1403 | 107089305 | 1.4568 | 1.3802 | 1.5335 | 0.0391 |
| Male | 2018 | 1459 | 108045192 | 1.4879 | 1.4114 | 1.5644 | 0.039 |
| Male | 2019 | 1474 | 108896735 | 1.4445 | 1.3703 | 1.5187 | 0.0379 |
| Male | 2020 | 1843 | 109725881 | 1.7801 | 1.6985 | 1.8617 | 0.0416 |

**Supplementary Table 3: Age adjusted mortality rates per 100,000 deaths stratified by gender in adults aged 25-85+ in the United States, 1999 to 2020**

| **Race** | **Year** | **Deaths** | **Population** | **Age Adjusted Rate** | **Age Adjusted Rate Lower 95% Confidence Interval** | **Age Adjusted Rate Upper 95% Confidence Interval** | **Age Adjusted Rate Standard Error** |
| --- | --- | --- | --- | --- | --- | --- | --- |
| Hispanic or Latino | 1999 | 21 | 17503631 | 0.3065 | 0.1872 | 0.4734 | 0.0683 |
| Hispanic or Latino | 2000 | 32 | 18219679 | 0.4715 | 0.3225 | 0.6656 | 0.0839 |
| Hispanic or Latino | 2001 | 35 | 19290018 | 0.4998 | 0.3481 | 0.6951 | 0.0847 |
| Hispanic or Latino | 2002 | 46 | 20159630 | 0.5846 | 0.4264 | 0.7823 | 0.0868 |
| Hispanic or Latino | 2003 | 54 | 21011656 | 0.6537 | 0.4882 | 0.8572 | 0.0908 |
| Hispanic or Latino | 2004 | 50 | 21877214 | 0.5781 | 0.4277 | 0.7642 | 0.0827 |
| Hispanic or Latino | 2005 | 70 | 22804023 | 0.7787 | 0.6059 | 0.9855 | 0.0939 |
| Hispanic or Latino | 2006 | 57 | 23743864 | 0.582 | 0.4384 | 0.7575 | 0.0784 |
| Hispanic or Latino | 2007 | 72 | 24673919 | 0.7054 | 0.5499 | 0.8913 | 0.0843 |
| Hispanic or Latino | 2008 | 86 | 25602850 | 0.7962 | 0.635 | 0.9857 | 0.0869 |
| Hispanic or Latino | 2009 | 81 | 26504021 | 0.7005 | 0.5555 | 0.8719 | 0.0782 |
| Hispanic or Latino | 2010 | 69 | 27192663 | 0.5606 | 0.4353 | 0.7107 | 0.0679 |
| Hispanic or Latino | 2011 | 216 | 28255675 | 1.6489 | 1.428 | 1.8698 | 0.1127 |
| Hispanic or Latino | 2012 | 259 | 28988437 | 1.8553 | 1.6285 | 2.082 | 0.1157 |
| Hispanic or Latino | 2013 | 111 | 29784174 | 0.7517 | 0.6118 | 0.8915 | 0.0714 |
| Hispanic or Latino | 2014 | 128 | 30809714 | 0.8058 | 0.666 | 0.9457 | 0.0714 |
| Hispanic or Latino | 2015 | 163 | 31761872 | 0.9556 | 0.8082 | 1.1031 | 0.0752 |
| Hispanic or Latino | 2016 | 199 | 32438262 | 1.0807 | 0.929 | 1.2324 | 0.0774 |
| Hispanic or Latino | 2017 | 191 | 33594503 | 0.9772 | 0.8373 | 1.1172 | 0.0714 |
| Hispanic or Latino | 2018 | 244 | 34350362 | 1.205 | 1.053 | 1.357 | 0.0775 |
| Hispanic or Latino | 2019 | 244 | 35025850 | 1.1751 | 1.0272 | 1.3231 | 0.0755 |
| Hispanic or Latino | 2020 | 320 | 35758193 | 1.4474 | 1.2875 | 1.6072 | 0.0815 |
| Black or African American | 1999 | 76 | 20503656 | 0.5664 | 0.4463 | 0.709 | 0.0651 |
| Black or African American | 2000 | 109 | 20775703 | 0.7889 | 0.6391 | 0.9388 | 0.0765 |
| Black or African American | 2001 | 131 | 21181572 | 0.95 | 0.7861 | 1.1138 | 0.0836 |
| Black or African American | 2002 | 157 | 21522362 | 1.1358 | 0.9571 | 1.3144 | 0.0911 |
| Black or African American | 2003 | 169 | 21858880 | 1.2099 | 1.0257 | 1.394 | 0.0939 |
| Black or African American | 2004 | 184 | 22258267 | 1.3029 | 1.1136 | 1.4922 | 0.0966 |
| Black or African American | 2005 | 196 | 22690893 | 1.3594 | 1.1686 | 1.5502 | 0.0973 |
| Black or African American | 2006 | 149 | 23137867 | 1.0102 | 0.847 | 1.1735 | 0.0833 |
| Black or African American | 2007 | 169 | 23577304 | 1.1242 | 0.9539 | 1.2944 | 0.0869 |
| Black or African American | 2008 | 178 | 24018935 | 1.142 | 0.9737 | 1.3102 | 0.0858 |
| Black or African American | 2009 | 174 | 24456946 | 1.0951 | 0.9319 | 1.2583 | 0.0833 |
| Black or African American | 2010 | 162 | 24802842 | 0.9758 | 0.8246 | 1.127 | 0.0771 |
| Black or African American | 2011 | 398 | 25288869 | 2.3021 | 2.0743 | 2.5299 | 0.1162 |
| Black or African American | 2012 | 421 | 25724605 | 2.3817 | 2.1533 | 2.6102 | 0.1166 |
| Black or African American | 2013 | 233 | 26175234 | 1.273 | 1.1083 | 1.4378 | 0.0841 |
| Black or African American | 2014 | 205 | 26742836 | 1.0671 | 0.9199 | 1.2143 | 0.0751 |
| Black or African American | 2015 | 224 | 27316901 | 1.1279 | 0.9789 | 1.277 | 0.076 |
| Black or African American | 2016 | 309 | 27833992 | 1.4981 | 1.3294 | 1.6668 | 0.0861 |
| Black or African American | 2017 | 299 | 28455786 | 1.4122 | 1.251 | 1.5733 | 0.0822 |
| Black or African American | 2018 | 362 | 28919914 | 1.65 | 1.4791 | 1.8209 | 0.0872 |
| Black or African American | 2019 | 364 | 29385485 | 1.6312 | 1.4628 | 1.7996 | 0.0859 |
| Black or African American | 2020 | 444 | 29818678 | 1.921 | 1.7414 | 2.1006 | 0.0916 |
| White | 1999 | 538 | 151306036 | 0.3403 | 0.3114 | 0.3692 | 0.0148 |
| White | 2000 | 680 | 152222052 | 0.4205 | 0.3888 | 0.4522 | 0.0162 |
| White | 2001 | 816 | 153608264 | 0.5062 | 0.4713 | 0.541 | 0.0178 |
| White | 2002 | 892 | 154739951 | 0.5438 | 0.508 | 0.5795 | 0.0182 |
| White | 2003 | 989 | 155864104 | 0.5917 | 0.5547 | 0.6288 | 0.0189 |
| White | 2004 | 1152 | 157144830 | 0.677 | 0.6379 | 0.7162 | 0.02 |
| White | 2005 | 1270 | 158595744 | 0.729 | 0.6888 | 0.7692 | 0.0205 |
| White | 2006 | 1288 | 160142968 | 0.7272 | 0.6873 | 0.7671 | 0.0204 |
| White | 2007 | 1408 | 161626163 | 0.7717 | 0.7312 | 0.8121 | 0.0206 |
| White | 2008 | 1309 | 163116422 | 0.7055 | 0.6671 | 0.744 | 0.0196 |
| White | 2009 | 1208 | 164541687 | 0.6344 | 0.5984 | 0.6704 | 0.0184 |
| White | 2010 | 1212 | 165644483 | 0.6387 | 0.6024 | 0.6749 | 0.0185 |
| White | 2011 | 3081 | 167382563 | 1.5556 | 1.5001 | 1.611 | 0.0283 |
| White | 2012 | 3468 | 168663175 | 1.7107 | 1.6532 | 1.7681 | 0.0293 |
| White | 2013 | 1901 | 169982244 | 0.9174 | 0.8758 | 0.9591 | 0.0212 |
| White | 2014 | 2025 | 171489057 | 0.9515 | 0.9096 | 0.9934 | 0.0214 |
| White | 2015 | 2416 | 173031552 | 1.1285 | 1.083 | 1.174 | 0.0232 |
| White | 2016 | 2767 | 174238249 | 1.275 | 1.227 | 1.323 | 0.0245 |
| White | 2017 | 3131 | 175747095 | 1.4126 | 1.3626 | 1.4625 | 0.0255 |
| White | 2018 | 3209 | 176757620 | 1.4215 | 1.372 | 1.4711 | 0.0253 |
| White | 2019 | 3306 | 177619677 | 1.4473 | 1.3977 | 1.4969 | 0.0253 |
| White | 2020 | 4218 | 178513471 | 1.8382 | 1.7825 | 1.8939 | 0.0284 |

**Supplementary Table 4: Age adjusted mortality rates per 100,000 deaths stratified by race in adults aged 25-85+ in the United States, 1999 to 2020**

| **Urbanization** | **Year** | **Deaths** | **Population** | **Age Adjusted Rate** | **Age Adjusted Rate Lower 95% Confidence Interval** | **Age Adjusted Rate Upper 95% Confidence Interval** | **Age Adjusted Rate Standard Error** |
| --- | --- | --- | --- | --- | --- | --- | --- |
| Metropolitan | 1999 | 495 | 151245342 | 0.3448 | 0.3142 | 0.3754 | 0.0156 |
| Metropolitan | 2000 | 621 | 152658699 | 0.4329 | 0.3987 | 0.4671 | 0.0174 |
| Metropolitan | 2001 | 718 | 154896258 | 0.4971 | 0.4607 | 0.5335 | 0.0186 |
| Metropolitan | 2002 | 823 | 156659051 | 0.5564 | 0.5182 | 0.5945 | 0.0195 |
| Metropolitan | 2003 | 928 | 158367715 | 0.6059 | 0.5667 | 0.6451 | 0.02 |
| Metropolitan | 2004 | 1023 | 160272097 | 0.6672 | 0.6262 | 0.7081 | 0.0209 |
| Metropolitan | 2005 | 1159 | 162371826 | 0.7408 | 0.6981 | 0.7835 | 0.0218 |
| Metropolitan | 2006 | 1132 | 164523389 | 0.699 | 0.6581 | 0.7398 | 0.0209 |
| Metropolitan | 2007 | 1237 | 166650886 | 0.7429 | 0.7013 | 0.7844 | 0.0212 |
| Metropolitan | 2008 | 1179 | 168826027 | 0.6909 | 0.6512 | 0.7306 | 0.0202 |
| Metropolitan | 2009 | 1078 | 170965574 | 0.6221 | 0.5847 | 0.6596 | 0.0191 |
| Metropolitan | 2010 | 1076 | 172591105 | 0.6101 | 0.5734 | 0.6468 | 0.0187 |
| Metropolitan | 2011 | 2911 | 175204532 | 1.5826 | 1.5245 | 1.6406 | 0.0296 |
| Metropolitan | 2012 | 3278 | 177423676 | 1.7371 | 1.6771 | 1.7971 | 0.0306 |
| Metropolitan | 2013 | 1773 | 179634449 | 0.9124 | 0.8695 | 0.9552 | 0.0219 |
| Metropolitan | 2014 | 1872 | 182304016 | 0.9423 | 0.8991 | 0.9854 | 0.022 |
| Metropolitan | 2015 | 2196 | 184959306 | 1.0789 | 1.0333 | 1.1245 | 0.0233 |
| Metropolitan | 2016 | 2616 | 186963190 | 1.2526 | 1.2039 | 1.3012 | 0.0248 |
| Metropolitan | 2017 | 2813 | 189675062 | 1.3249 | 1.2755 | 1.3742 | 0.0252 |
| Metropolitan | 2018 | 2943 | 191415024 | 1.3693 | 1.3195 | 1.419 | 0.0254 |
| Metropolitan | 2019 | 3009 | 193006488 | 1.3611 | 1.3121 | 1.4101 | 0.025 |
| Metropolitan | 2020 | 3877 | 194600110 | 1.7358 | 1.681 | 1.7907 | 0.028 |
| Non Metropolitan | 1999 | 126 | 29163427 | 0.3688 | 0.3043 | 0.4333 | 0.0329 |
| Non Metropolitan | 2000 | 177 | 29325941 | 0.5028 | 0.4282 | 0.5773 | 0.038 |
| Non Metropolitan | 2001 | 238 | 29408870 | 0.6726 | 0.5868 | 0.7585 | 0.0438 |
| Non Metropolitan | 2002 | 241 | 29548977 | 0.6853 | 0.5988 | 0.7719 | 0.0442 |
| Non Metropolitan | 2003 | 253 | 29722714 | 0.7098 | 0.6222 | 0.7975 | 0.0447 |
| Non Metropolitan | 2004 | 337 | 29933287 | 0.9375 | 0.8373 | 1.0378 | 0.0512 |
| Non Metropolitan | 2005 | 339 | 30179558 | 0.9341 | 0.8343 | 1.0338 | 0.0509 |
| Non Metropolitan | 2006 | 327 | 30495970 | 0.8973 | 0.7998 | 0.9948 | 0.0497 |
| Non Metropolitan | 2007 | 371 | 30752891 | 0.9996 | 0.8978 | 1.1015 | 0.052 |
| Non Metropolitan | 2008 | 346 | 30969063 | 0.9123 | 0.8158 | 1.0089 | 0.0493 |
| Non Metropolitan | 2009 | 336 | 31141442 | 0.8935 | 0.7977 | 0.9892 | 0.0488 |
| Non Metropolitan | 2010 | 344 | 31300878 | 0.8919 | 0.7972 | 0.9866 | 0.0483 |
| Non Metropolitan | 2011 | 694 | 31388404 | 1.7782 | 1.6454 | 1.911 | 0.0677 |
| Non Metropolitan | 2012 | 755 | 31402361 | 1.8997 | 1.7635 | 2.0358 | 0.0694 |
| Non Metropolitan | 2013 | 427 | 31450865 | 1.0551 | 0.9545 | 1.1556 | 0.0513 |
| Non Metropolitan | 2014 | 433 | 31505264 | 1.046 | 0.947 | 1.1451 | 0.0505 |
| Non Metropolitan | 2015 | 525 | 31594511 | 1.2605 | 1.1521 | 1.3689 | 0.0553 |
| Non Metropolitan | 2016 | 585 | 31678227 | 1.3828 | 1.2702 | 1.4954 | 0.0574 |
| Non Metropolitan | 2017 | 722 | 31772269 | 1.6873 | 1.5636 | 1.811 | 0.0631 |
| Non Metropolitan | 2018 | 730 | 31896166 | 1.6823 | 1.56 | 1.8046 | 0.0624 |
| Non Metropolitan | 2019 | 781 | 31974679 | 1.7797 | 1.6545 | 1.9048 | 0.0639 |
| Non Metropolitan | 2020 | 926 | 32028405 | 2.0764 | 1.9422 | 2.2106 | 0.0685 |

**Supplementary Table 5: Age adjusted mortality rates per 100,000 deaths stratified by urbanization in adults aged 25-85+ in the United States, 1999 to 2020**

| **State** | **Deaths** | **Population** | **Age Adjusted Rate** | **Age Adjusted Rate Lower 95% Confidence Interval** | **Age Adjusted Rate Upper 95% Confidence Interval** | **Age Adjusted Rate Standard Error** |
| --- | --- | --- | --- | --- | --- | --- |
| Alabama | 694 | 68915349 | 0.9693 | 0.8968 | 1.0419 | 0.037 |
| Alaska | 52 | 9623822 | 1.1238 | 0.8393 | 1.4738 | 0.1566 |
| Arizona | 785 | 90089006 | 0.8105 | 0.7537 | 0.8674 | 0.029 |
| Arkansas | 429 | 41711420 | 0.9204 | 0.8331 | 1.0076 | 0.0445 |
| California | 7633 | 530625638 | 1.4795 | 1.4462 | 1.5129 | 0.017 |
| Colorado | 1187 | 73189174 | 1.9147 | 1.8053 | 2.0241 | 0.0558 |
| Connecticut | 483 | 53012824 | 0.7017 | 0.6385 | 0.7649 | 0.0323 |
| Delaware | 102 | 13210778 | 0.7228 | 0.5818 | 0.8638 | 0.0719 |
| District of Columbia | 63 | 9448827 | 0.7127 | 0.5464 | 0.9136 | 0.0903 |
| Florida | 1912 | 289701852 | 0.4778 | 0.4563 | 0.4993 | 0.011 |
| Georgia | 1005 | 135415629 | 0.9314 | 0.8735 | 0.9892 | 0.0295 |
| Hawaii | 171 | 20066183 | 0.661 | 0.5608 | 0.7611 | 0.0511 |
| Idaho | 164 | 21392071 | 0.7475 | 0.6328 | 0.8622 | 0.0585 |
| Illinois | 1443 | 184489320 | 0.7269 | 0.6891 | 0.7647 | 0.0193 |
| Indiana | 1524 | 92386904 | 1.5238 | 1.4469 | 1.6007 | 0.0393 |
| Iowa | 639 | 44030204 | 1.0264 | 0.9459 | 1.107 | 0.0411 |
| Kansas | 337 | 39931570 | 0.6821 | 0.6086 | 0.7556 | 0.0375 |
| Kentucky | 1004 | 63061451 | 1.6055 | 1.506 | 1.7049 | 0.0507 |
| Louisiana | 488 | 64895449 | 0.787 | 0.7171 | 0.857 | 0.0357 |
| Maine | 192 | 20521512 | 0.7632 | 0.6546 | 0.8717 | 0.0554 |
| Maryland | 501 | 84902583 | 0.604 | 0.5508 | 0.6571 | 0.0271 |
| Massachusetts | 776 | 99096796 | 0.6283 | 0.5838 | 0.6728 | 0.0227 |
| Michigan | 1736 | 145550610 | 1.0654 | 1.015 | 1.1158 | 0.0257 |
| Minnesota | 1306 | 77002440 | 1.4489 | 1.3696 | 1.5283 | 0.0405 |
| Mississippi | 415 | 41496865 | 0.9827 | 0.8878 | 1.0775 | 0.0484 |
| Missouri | 1045 | 86518061 | 1.0383 | 0.975 | 1.1016 | 0.0323 |
| Montana | 114 | 14577633 | 0.6604 | 0.5388 | 0.782 | 0.062 |
| Nebraska | 342 | 25869503 | 1.0619 | 0.9482 | 1.1757 | 0.058 |
| Nevada | 114 | 38580189 | 0.3725 | 0.3035 | 0.4414 | 0.0352 |
| New Hampshire | 235 | 19856602 | 1.1065 | 0.9645 | 1.2486 | 0.0725 |
| New Jersey | 861 | 130947870 | 0.5755 | 0.5367 | 0.6142 | 0.0198 |
| New Mexico | 175 | 28568524 | 0.6017 | 0.5125 | 0.691 | 0.0455 |
| New York | 1346 | 288624005 | 0.3994 | 0.3779 | 0.4208 | 0.011 |
| North Carolina | 1777 | 137233223 | 1.3347 | 1.2725 | 1.397 | 0.0317 |
| North Dakota | 268 | 9822062 | 1.9373 | 1.7006 | 2.1739 | 0.1207 |
| Ohio | 2245 | 169651360 | 1.1484 | 1.1007 | 1.1961 | 0.0243 |
| Oklahoma | 759 | 53110132 | 1.3365 | 1.2412 | 1.4319 | 0.0487 |
| Oregon | 868 | 57214641 | 1.3311 | 1.2421 | 1.4201 | 0.0454 |
| Pennsylvania | 2182 | 189975429 | 0.8559 | 0.8197 | 0.892 | 0.0185 |
| Rhode Island | 205 | 15765032 | 0.9549 | 0.8224 | 1.0874 | 0.0676 |
| South Carolina | 924 | 67227226 | 1.4116 | 1.3203 | 1.503 | 0.0466 |
| South Dakota | 252 | 11603220 | 1.5786 | 1.3813 | 1.7759 | 0.1007 |
| Tennessee | 1472 | 92689763 | 1.6148 | 1.5322 | 1.6974 | 0.0421 |
| Texas | 3788 | 344632461 | 1.3267 | 1.2842 | 1.3691 | 0.0216 |
| Utah | 256 | 34057911 | 0.9292 | 0.815 | 1.0434 | 0.0583 |
| Vermont | 123 | 9393709 | 1.1262 | 0.9266 | 1.3259 | 0.1019 |
| Virginia | 937 | 116579933 | 0.8575 | 0.8023 | 0.9126 | 0.0281 |
| Washington | 1726 | 98931323 | 1.7525 | 1.6694 | 1.8356 | 0.0424 |
| West Virginia | 529 | 28023276 | 1.6106 | 1.4732 | 1.748 | 0.0701 |
| Wisconsin | 1115 | 82712057 | 1.1088 | 1.0431 | 1.1744 | 0.0335 |
| Wyoming | 71 | 7921067 | 0.9177 | 0.7167 | 1.1575 | 0.1091 |

**Supplementary Table 6: Age adjusted mortality rates per 100,000 deaths stratified by states in adults aged 25-85+ in the United States, 1999 to 2020**
